# Supplementary material for: Potential Anti-Mycobacterium tuberculosis Activity of Plant Secondary Metabolites: Insight with Molecular Docking Interactions
Source: MDPI journal article supplement (doi:10.3390/antiox10121990), 2021-12-14
Supplement: s1 [file s1]

**Table S1.** The binding energy of interacted residues of receptors proteins of *M. tuberculosis* with diverse phytochemicals.

| <b>Interactions with 3zxr</b>      | <b>Binding Energy (kcal/mol)</b> |
|------------------------------------|----------------------------------|
| <b>Aloin</b>                       | -6.28                            |
| ISN                                | -5.424                           |
| Oleanolic acid                     | -5.048                           |
| Octyl- $\beta$ -d- Glucopyranoside | -3.122                           |
| Alliin                             | -2.421                           |
| Phytol                             | -1.942                           |
| EMB                                | -0.938                           |
| <b>Interactions with 3pty</b>      | <b>Binding Energy (kcal/mol)</b> |
| Aloin                              | -6.89                            |
| ISN                                | -6.375                           |
| Oleanolic acid                     | -4.27                            |
| Octyl- $\beta$ -d- Glucopyranoside | -4.462                           |
| Alliin                             | -5.382                           |
| Phytol                             | -1.113                           |
| EMB                                | -2.963                           |
| <b>Interactions with 4ow8</b>      | <b>Binding Energy (kcal/mol)</b> |
| Aloin                              | -5.209                           |
| ISN                                | -5.91                            |
| oleanolic acid                     | -3.628                           |
| Octyl- $\beta$ -d- Glucopyranoside | -4.395                           |
| Alliin                             | -4.959                           |
| Phytol                             | -1.316                           |
| EMB                                | -2.66                            |
